1 **Nodal secures pluripotency upon embryonic stem cell progression from the**  
2 **ground state**

3

4 Carla Mulas<sup>1</sup>, Tüzer Kalkan<sup>1</sup>, Austin Smith<sup>1,2,\*</sup>

5

6 <sup>1</sup>Wellcome Trust – Medical Research Council Stem Cell Institute, University of  
7 Cambridge, Tennis Court Road, CB2 1QR, Cambridge, UK

8 <sup>2</sup>Department of Biochemistry, University of Cambridge, Tennis Court Road, CB2 1GA,  
9 Cambridge, UK

10 \*Correspondence: [austin.smith@cscr.cam.ac.uk](mailto:austin.smith@cscr.cam.ac.uk)

11

12

13 **Running title (50 characters):**

14 **Nodal capacitates pluripotency**

15

16

17

18

19

20 **SUMMARY (150 words)**

21 Naïve mouse embryonic stem (ES) cells can readily acquire specific fates, but the  
22 cellular and molecular processes that enable lineage specification are poorly  
23 characterised. Here we investigated progression from the ES cell ground state in  
24 adherent culture. We utilised down-regulation of *Rex1::GFPd2* to track loss of ES cell  
25 identity. We found that cells that have newly down-regulated this reporter have acquired  
26 competence for germline induction. They can also be efficiently specified for different  
27 somatic lineages, responding more rapidly than naïve cells to inductive cues. Nodal is a  
28 candidate autocrine regulator of pluripotency. Abrogation of Nodal signalling did not  
29 substantially alter kinetics of exit from the ES cell state, but accelerated subsequent  
30 adoption of neural fate at the expense of other lineages. This effect was evident if Nodal  
31 was inhibited prior to extinction of ES cell identity. We suggest that Nodal is pivotal for  
32 non-neural competence in cells departing naïve pluripotency.

### 33 INTRODUCTION

34 Pluripotency denotes a flexible cellular potential to differentiate into all lineages of the  
35 developing embryo. This property emerges in the epiblast of the pre-implantation  
36 blastocyst (Boroviak et al., 2014; Gardner, 1975; Rossant, 1975). After implantation,  
37 epiblast cells remain pluripotent while undergoing profound cellular and molecular  
38 changes in preparation for gastrulation (Smith, *in press*). In mice the post-implantation  
39 epiblast develops into a cup-shaped epithelium, the egg cylinder. Signalling cues from  
40 extra-embryonic tissues then pattern the egg cylinder to establish anterior-posterior and  
41 proximal-distal axes prior to lineage specification (Arnold and Robertson, 2009;  
42 Beddington and Robertson, 1998; Peng et al., 2016; Rossant and Tam, 2009; Thomas  
43 and Beddington, 1996).

44 In mouse the naive phase of pluripotency can be captured in culture in the form of  
45 embryonic stem (ES) cells (reviewed by Nichols and Smith, 2012). Dual inhibition (2i) of  
46 Mek1/2 and GSK3, in optional combination with the cytokine Leukemia Inhibitory Factor  
47 (LIF), allows mouse ES cells to maintain the transcription profile, DNA methylation  
48 status and developmental potential characteristic of the pre-implantation epiblast from  
49 which they are derived (Boroviak et al., 2014; 2015; Habibi et al., 2013; Leitch et al.,  
50 2013; Ying et al., 2008). ES cells in 2i are stable and relatively homogeneous, a  
51 condition referred to as “ground state” (Marks et al., 2012; Wray et al., 2010). Such  
52 uniformity in defined conditions provides an experimental system to characterise cellular  
53 and molecular events that generate multiple lineage-committed states from a  
54 developmental blank canvas.

55 ES cell progression from the ground state is initiated simply by removal of the  
56 inhibitors. In adherent culture this results predominantly in neural specification (Ying et

57 al., 2003) or in a mixture of neural and mesoendodermal fates, depending on cell  
58 density (Kalkan et al., 2016). Previous studies have identified expression of Rex1 (gene  
59 name *Zfp42*) as a marker of undifferentiated ES cells (Betschinger et al., 2013; Kalkan  
60 and Smith, 2014; Leeb et al., 2014; Toyooka et al., 2008; Wray et al., 2010; 2011; Yang  
61 et al., 2012). In this study, we exploit a *Rex1::GFPd2 (RGd2)* reporter cell line (Kalkan  
62 et al., 2016) to isolate cells at initial stages of progression from naïve pluripotency  
63 following release from 2i in adherent serum-free culture. We examine whether cells  
64 exiting the ES cell state guided by autocrine cues commit preferentially to a neural fate  
65 or exhibit competence for multilineage differentiation.

66

67

## 68 **RESULTS**

69

### 70 **Multi-lineage differentiation capacity is retained after loss of naïve ES cell** 71 **identity**

72 In *Rex1::GFPd2 (RGd2)* reporter ES cells, a short half-life GFP is expressed from the  
73 endogenous Rex1 (*Zfp42*) locus (Marks et al., 2012; Wray et al., 2011). Loss of the  
74 reporter coincides with downregulation of naïve pluripotency factors and functionally  
75 with extinction of clonal self-renewal capacity (Kalkan et al., 2016) (Figure S1A-D). GFP  
76 downregulation is asynchronous across the population. For at least 16 hours cell  
77 remain uniformly GFP positive (Kalkan et al., 2016). By 24hrs, however, GFP is  
78 expressed at variable levels and in a minority of cells the reporter is no longer  
79 detectable. These Rex1-negative cells have lost the capacity to resume self-renewal in  
80 2i/LIF, whereas cells with high GFP retain comparable colony forming efficiency to cells

81 taken directly from 2i (Figure S1C). We focussed attention on the character of cells  
82 24hrs after 2i withdrawal, the first time point at which it is practical to isolate a  
83 substantial population of Rex1-negative cells by flow cytometry (Kalkan et al, 2016).

84 We first investigated capacity to form primordial germ cell-like cells (PGCLC).  
85 Previous studies have shown that undifferentiated ES cells are not directly competent  
86 for germline specification but must first transition to a transient epiblast-like (EpiLC)  
87 population which can then be induced to form PGCLC (Hayashi et al., 2011; Nakaki et  
88 al., 2013). The EpiLC population is obtained by transfer from 2i/LIF to N2B27 medium  
89 supplemented with ActivinA, bFGF and the serum substitute KSR for 48hrs (Hayashi et  
90 al., 2011). We assessed whether the first cells that exit the ground state in N2B27 alone  
91 exhibit competence to form PGCLC. For this purpose we used RGd2 ES cells  
92 transfected with a doxycycline (Dox)-regulatable expression construct containing the  
93 three germ line determination factors *Prdm1* (Blimp1), *Prdm14* and *Tfap2c*  
94 (Magnúsdóttir et al., 2012; Nakaki et al., 2013). Stable transfectants were withdrawn  
95 from 2i for 24hrs and the high and low GFP fractions isolated by fluorescence-activated  
96 cell sorting (FACS) (Figure 1A). For each fraction, 3000 cells were aggregated in non-  
97 adherent 96 well plates in medium containing 15% KSR with or without Dox (Nakaki et  
98 al., 2013). After 4 days, few cells co-expressing Blimp1 with Oct4 were present in  
99 aggregates from either population without Dox. Dox treatment did not increase the  
100 frequency of co-expression from Rex1-positive cells, but induced many double positive  
101 cells from the Rex1-negative fraction (Figure 1B and C). Dual expression of Blimp1 and  
102 Oct4 is a combination unique to PGCs and PGCLCs (Hayashi et al., 2011; Kurimoto et  
103 al., 2008; Nakaki et al., 2013). Furthermore, undifferentiated ES cells do not tolerate  
104 appreciable levels of Blimp1 protein (Magnúsdóttir et al., 2013). Quantitative image

105 analysis confirmed more intense Blimp1 staining in cultures derived from Rex1-negative  
106 cells (Figure 1D). By RT-qPCR analysis we detected upregulated expression of  
107 endogenous *Prdm1* (Blimp1), along with *Prdm14*, *Tfap2c*, *Nanos3* and *Stella*, as well as  
108 maintenance of *Pou5f1* (Oct4) (Figure 1E). *T* (Bra) was induced transiently on day 2 as  
109 previously described for PGCLC induction (Figure 1E) (Nakaki et al., 2013). Thus ES  
110 cells that have newly exited the ground state under autocrine stimulation in defined  
111 conditions acquire competence for germline specification.

112 We then examined somatic lineage potential of Rex1-negative cells. Sorted fractions  
113 were plated in media that favour mesoderm, definitive endoderm or neural lineages  
114 respectively and the timing and efficiency of differentiation quantified.

115 ActivinA combined with GSK3 inhibition (GSK3(i)), elicits the upregulation of  
116 primitive-streak markers such as T (*Tbra*) in differentiating ES cells (Gadue et al., 2006;  
117 Tsakiridis et al., 2014; Turner et al., 2014) Morrison et al., 2015). We modified *RGd2*  
118 cells to express an mKO2 fluorescent reporter from the *T(Bra)* locus (Figure 2A).  
119 *T::mKO2* was not expressed in undifferentiated ES cells in 2i (Figure S2A), and not  
120 detected until day 3 of treatment with Activin plus GSK3(i). In contrast, Rex1-negative  
121 cells replated in the presence of ActivinA and GSK3(i) upregulated *T::mKO2* after one  
122 day and all cells were positive by day 2. Rex1-positive cells upregulated *T::mKO2* at an  
123 intermediate rate and some cells remained GFP-positive even after 3 days, indicating  
124 they remained undifferentiated and unresponsive to differentiation cues (Figure 2B). To  
125 test further mesoderm differentiation, we plated the sorted fractions in conditions that  
126 promote lateral mesoderm (Nishikawa et al., 1998; Yamashita et al., 2000). All  
127 populations gave rise to Flk1 positive/E-cadherin negative cells after 4-5 days (Figure  
128 2C).

129 Differentiation into definitive endoderm was assessed by monitoring the percentage  
130 of Cxcr4/E-cadherin double positive cells (Morrison et al., 2008; Yasunaga et al., 2005)  
131 under inductive conditions applied after sorting (Morrison et al., 2015)(Figure 2D).  
132 Compared to 2i cells or the Rex1-positive population, a lower proportion of Rex1-  
133 negative cells upregulated Cxcr4 (Figure 2E). However, we observed that the majority of  
134 Rex1-negative cells died after replating in these conditions (Figure 2F). The survivors  
135 could form Sox17/Foxa2 double positive cells, although with lower efficiency than 2i or  
136 Rex1-positive cells (Figure S2B). Every Sox17 positive cell was also positive for Foxa2,  
137 substantiating endoderm identity (Burtscher and Lickert, 2009). Acquisition of the later  
138 marker, Sox17, was specifically reduced in the Rex1-negative cells. We hypothesised  
139 that Rex1-negative cells might display impaired survival and differentiation because of a  
140 requirement for high cell density and cell-cell contact for the endoderm programme. We  
141 therefore combined sorted cells with unsorted populations to reproduce the density of  
142 non-manipulated cultures (Figure 2G). To trace the sorted cell progeny we employed  
143 *RGd2* cells constitutively labelled with mKO2 under the control of a CAG promoter  
144 (Niwa et al., 1991). Two hundred sorted labelled cells were plated together with  $5.8 \times 10^3$   
145 parental cells per 3.8cm<sup>2</sup> dish. Cells were exposed to definitive endoderm differentiation  
146 media then fixed and stained for Sox17 at day 4. The total number of mKO2 positive  
147 clones was determined, as well as the number of Sox17 positive cells per clone and  
148 clone sizes using CellProfiler (Jones et al., 2008). Slightly fewer clones were obtained  
149 from Rex1-negative cells (Figure 2H, Student t-test  $p < 0.05$ ) and their distribution was  
150 skewed towards smaller colonies (Figure 2I, two-sample Kolmogorov-Smirnov test  
151  $p < 0.001$ ), with more Sox17 negative cells per colony (Figure 2J, two-sample  
152 Kolmogorov-Smirnov test  $p < 0.01$ ). These differences were modest however.

153 Importantly, the majority of Rex1-negative cells were able to produce colonies  
154 containing Sox17 positive cells.

155 Finally, we examined cell fate acquisition in N2B27 alone, which is permissive for  
156 neural differentiation (Ying et al., 2003). The great majority ( $\leq 80\%$ ) of cells from both  
157 Rex1 fractions became immunopositive for Sox1, an exclusive marker of neurectoderm  
158 (Pevny et al., 1998; Zhang et al., 2010) (Figure 2K). However, Rex1-negative cells  
159 showed earlier upregulation of Sox1, with most cells becoming Sox1 positive on day 2,  
160 a day before the Rex1-positive population (Figure 2K). Cell viability and expansion were  
161 not significantly different between the populations (Figure S2C). Rex1-negative cells  
162 subsequently also showed accelerated onset of expression of the neuronal marker type  
163 III  $\beta$ -tubulin (Lee et al., 1990)(Figure S2D).

164 Overall, these data indicate that after 24hrs of monolayer differentiation guided by  
165 autocrine cues, cells in the Rex1-negative population are poised for multilineage  
166 specification and respond more rapidly to induction than either ground state ES cells or  
167 Rex1-positive cells.

168

### 169 **Nodal does not regulate kinetics of exit from the naïve state**

170 FGF4 is a known autocrine factor that drives ES cell transition upon release from 2i  
171 (Betschinger et al., 2013; Kunath et al., 2007; Leeb et al., 2014; Stavridis et al., 2007). A  
172 second potential autocrine regulator is Nodal (Fiorenzano et al., 2016; Mullen et al.,  
173 2011; Ogawa et al., 2007). Detection of Smad2 phosphorylation indicates that  
174 endogenous Nodal/TGF $\beta$  signalling is active in ES cells in 2i (Figure S3A). Treatment  
175 with the Alk5/4/7 receptor inhibitor A83-01 (Alk(i)) (Tojo et al., 2005) eliminated Smad2  
176 phosphorylation after 30 minutes (Figure S3A). However, culture in Alk(i) did not affect



177 colony forming capacity in 2i/LIF, even after continuous culture for three passages  
178 (Figure S3B), confirming that Nodal plays little or no role in maintenance of ground state  
179 mouse ES cells.

180 We examined the contribution of autocrine Nodal signalling in progression from the  
181 ES cell state. We analysed changes in gene expression in cells withdrawn from 2i in the  
182 continuous presence of Alk(i) and found no difference in the dynamics of  
183 downregulation of *Nanog* or *Klf2* mRNA (Figure 3B), nor of Nanog and Klf4 protein  
184 (Figure 3C). The rate of decay in ES cell clonogenicity was also unaffected (Figure 3D).  
185 We conclude that Nodal signalling does not promote initial exit from the naïve state.

186 We examined expression of genes associated with the early post-implantation  
187 epiblast. Initial upregulation of pan-epiblast genes *Fgf5* and *Otx2* was not significantly  
188 altered when Nodal signalling was inhibited (Figure 4E). However, these genes were  
189 subsequently downregulated more abruptly on day 3/4 (Figure 4E). Conversely,  
190 transcripts for neuroectodermal lineage factors *Sox1*, *Zic1* and *Pou3f3* were strongly up-  
191 regulated in day 3/4 Alk(i) treated cultures, before appreciable expression in vehicle  
192 treated cells (Figure 3F). At the protein level, most cells in Alk(i) treated cultures had  
193 downregulated Oct4 and were Sox1 positive after 3 days, indicative of neural  
194 commitment, whereas control cultures displayed a mosaic pattern of co-exclusive Sox1  
195 and Oct4 immunostaining (Lowell, 2006) (Figure 3G).

196 To validate findings with the inhibitor we deployed siRNAs against Nodal signalling  
197 pathway components. In *Nodal*, *Smad2/3* and *Tdgf1* knockdown experiments the  
198 emergence of Oct4-/Sox2+ and Sox2+/Sox1+ cells was accelerated (Figure S3C-D).  
199 We conclude that suppression of Nodal signalling does not substantially affect initial exit  
200 from the naïve state but promotes subsequent specification to the neural lineage.

201

202 **Nodal signalling is required to prevent precocious neuralisation and to potentiate**  
203 **other lineages**

204 Examination of Nodal signalling components in RNAseq data from *RGd2* sorted cells  
205 (Kalkan et al., 2016) revealed that pathway ligands, receptors, intracellular mediators  
206 and target genes are expressed in undifferentiated ES cells and in 24hr Rex1 positive  
207 cells. Rex1-negative cells, however, display reduced expression of *Nodal*, Nodal  
208 proprotein convertase *Pcsk6* (*Pace4*), and Nodal signalling pathway targets *Lefty1*,  
209 *Lefty2* and *Smad7* (Figure S4A). Consistent with pathway down-regulation in Rex1-  
210 negative cells, we found that when cells were exposed to Alk(i) only after sorting, the  
211 Rex1-negative fraction showed no change in kinetics of Sox1 acquisition. In contrast the  
212 Rex1-positive population responded by accelerated expression at day 2 (Figure 4A,  
213 Student t-test  $p < 0.05$ ).

214 In light of these results, we postulated that Nodal signalling may function during the  
215 primary transition from naïve pluripotency. We therefore inhibited Nodal signalling for  
216 only the 24hrs immediately following 2i withdrawal and analysed the resulting Rex1-  
217 negative cells (Figure S4B). In line with previous results for continuous treatment,  
218 exposure to Alk(i) for 24hrs had little effect on downregulation of Rex1 (Figure S4B) or  
219 of naïve pluripotency factor transcripts for *Nanog*, *Esrrb*, *Zfp42* (Rex1) and *Klf4* (Figure  
220 S4C). Upregulation of early post-implantation markers *Fgf5*, *Dnmt3b*, *Otx2* and *Pou3f1*  
221 was also similar to vehicle-treated cells (Figure S4C). *Sox1* mRNA was not detected at  
222 24hrs, irrespective of the presence of Alk(i) (Figure S4D). Sox1 protein was detectable  
223 only in a minority of untreated cells on day 1 after sorting and increased thereafter. In  
224 contrast up to half of cells generated after Alk(i)-treatment upregulated Sox1 protein on

225 day 1 (Figure 4B). This difference does not appear to be due to differential replating  
226 efficiency (Figure 4C).

227 We examined whether faster neural specification as a consequence of Alk(i) pre-  
228 treatment has consequences for other lineages. We analysed the response of Alk(i)-  
229 treated cells to ActivinA/Gsk3(i). Rex1-negative cells showed a major reduction in the  
230 total number of *T::mKO2* positive cells (Figure 4D). Interestingly, this was mainly  
231 attributable to reduced cell numbers after exposure to ActivinA/Gsk3(i) (Figure 4E,  
232 S4E). A similar reduction in cell survival/proliferation was observed in cells exposed to  
233 lateral mesoderm differentiation conditions (Figure S4F-H). To evaluate endodermal  
234 specification we employed the clonal mixing protocol described previously (Figure 4F).  
235 We observed a shift to fewer Sox17 positive cells per clone (Figure 4G), although the  
236 clone sizes (Figure 4H) or total number of clones (Figure S4I) were not reduced in the  
237 Alk(i) pre-treated population

238 Finally, we assessed whether pre-treatment with Alk(i) for 24hrs affected the potential  
239 of Rex1-negative cells to respond to PGC-inducing transcription factors (Figure 4I).  
240 Alk(i)-treated cells produced less compact and smaller aggregates than control cultures  
241 (Figure 4I). The gene expression profile at day 2 and 4 of culture showed lower  
242 upregulation of endogenous *Prdm1* (Blimp1), *Prdm14*, *Nanos3* and *Stella*, indicating  
243 significantly impaired PGCLC induction.

244 These findings indicate that suppression of Nodal signalling reduces the capacity of  
245 cells exiting the naïve phase of pluripotency to respond productively to inductive cues  
246 for mesoderm, endoderm, and germ cell specification.

247

248

## 249 **DISCUSSION**

250 The defined context of ground state ES cell culture provides opportunities for  
251 experimentally dissecting the interplay between intrinsic and extrinsic factors that  
252 mediate progression through pluripotency. Here we investigated the trajectory of ES  
253 cells released from the ground state with minimal extrinsic input. We isolated cells that  
254 have lost ES cell identity within 24hrs based on down-regulation of *RGd2*, corroborated  
255 functionally by extinction of self-renewal capability (Kalkan et al., 2016). Newly formed  
256 Rex1-negative cells exhibited capacity for differentiation into the germline and somatic  
257 lineages (Smith, *in press*). The findings further indicate that endogenous Nodal  
258 signalling is crucial for the non-neural competence of cells transitioning from naïve  
259 pluripotency.

260 Rex1-negative cells show more rapid upregulation of lineage markers in response to  
261 inductive stimuli compared with ground state ES cells or Rex1-positive cells at 24hrs.  
262 They have also gained capacity for PGCLC induction. It has previously been  
263 established that responsiveness to germ cell induction cues or factors is not manifest in  
264 naive ES cells or the pre-implantation epiblast but is a property acquired during  
265 developmental progression (Hayashi et al., 2011; Nakaki et al., 2013). We present  
266 evidence elsewhere that early Rex1-negative cells show intermediate gene expression  
267 features suggesting they are related to the peri-implantation epiblast (Kalkan et al.,  
268 2016). We hypothesise that actual competence for germline and somatic lineage  
269 specification is acquired during this period (Smith, *in press*). The molecular nature of  
270 competence remains unclear but is likely to involve dissolution of naïve pluripotency  
271 transcription factor circuitry, reconfiguration of the enhancer landscape, and widespread

272 epigenome and chromatin modification (Buecker et al., 2014; Choi et al., 2016; Dunn et  
273 al., 2014; Zyllicz et al., 2015).

274 Nodal plays pleiotropic roles in the early embryo. Expression can be detected in the  
275 inner cell mass and persists throughout the epiblast until axis specification, when it  
276 becomes restricted to the proximal posterior region (Conlon et al., 1994; Mesnard et al.,  
277 2006). Nodal activity relies on proprotein convertases, Furin and PACE4, produced by  
278 the extraembryonic ectoderm (ExE), which cleave and activate pro-Nodal (Beck et al.,  
279 2002; Mesnard et al., 2011). *Nodal* deficient embryos show embryonic lethality at E7.5  
280 (Conlon et al., 1994; 1991; Zhou et al., 1993). They fail to specify the anterior visceral  
281 endoderm (AVE) (Brennan et al., 2001), a signalling centre essential for the  
282 establishment of anterior-posterior (AP) polarity. Nodal mutants also show precocious  
283 upregulation of neural markers throughout the egg cylinder and fail to form a primitive  
284 streak (Brennan et al., 2001; Camus et al., 2006; Lu and Robertson, 2004). The multiple  
285 functions of Nodal and the complex interplay between extraembryonic tissues and the  
286 epiblast have complicated precise delineation of its roles in pluripotency progression  
287 and lineage specification (Robertson, 2014).

288 Mouse ES cells express Nodal and have phosphorylated Smad2/3 proteins (Mullen et  
289 al., 2011; Ogawa et al., 2004). Inhibition of Nodal signalling enhances Sox1 expression  
290 during differentiation (Matulka et al., 2013; Turner et al., 2014). Our results show that  
291 inhibition of endogenous Nodal signalling does not affect the downregulation of  
292 pluripotency factors when ground state ES cells are released from 2i, consistent with  
293 previous findings (Turner et al. 2014). Upregulation of early post-implantation markers is  
294 also unaffected. However, suppression of Nodal signalling results in compromised  
295 responses to inductive stimuli for mesoderm and endoderm, and in precocious

296 upregulation of neural markers. Cells also become less responsive to the forced  
297 expression of PGC-specific transcription factors.

298 Importantly, a requirement for Nodal signalling is apparent prior to exit from the ES  
299 cell state, while cells are in the reversible Rex1 positive period of transition (Kalkan et  
300 al., 2016; Martello and Smith, 2014). Indeed, subsequent to exit Rex1-negative cells in  
301 vitro down-regulate Nodal and become dependent on exogenous ligand for non-neural  
302 lineage induction, typically achieved by addition of ActivinA. A similar reduction in the  
303 expression of *Nodal* and Nodal target genes is seen in E5.75 epiblast explants after  
304 removal of the extraembryonic ectoderm (ExE) (Guzman-Ayala et al., 2004; Mesnard et  
305 al., 2006), highlighting the paracrine role of ExE in maintaining Nodal signalling in the  
306 embryo.

307 Our findings in the simple monolayer ES cell system are consistent with genetic  
308 evidence that Nodal signalling prevents premature neural differentiation in the embryo  
309 (Camus et al., 2006). Importantly, however, they also indicate that endogenous Nodal  
310 signalling acts during progression from naïve pluripotency to secure non-neural lineage  
311 potency. It has been reported that Smad2/3 is recruited by ‘master transcription factors’  
312 to regulatory loci in a cell type-specific manner (Mullen et al., 2011). In addition, a recent  
313 study in human ES cells also suggested that Smad2/3 is able to recruit histone  
314 methyltransferases to gene promoters (Bertero et al., 2015). Therefore, non-neural  
315 competence could depend upon the presence of Smad2/3 at specific loci during the ES  
316 cell transition from naïve pluripotency.

317 Overall these results are consistent with the proposition that in defined adherent  
318 culture, ES cells transit through a formative phase in which they acquire competence for  
319 multilineage differentiation, including the germline (Kalkan and Smith, 2014; Smith, *in*

320 *press*). In this phase, cells are expected to respond to inductive signals rapidly and  
321 efficiently, as observed for Rex1 negative cells at 24hrs. Furthermore, our findings  
322 highlight a pivotal requirement for Nodal signalling in establishing formative  
323 pluripotency.

324

## 325 **EXPERIMENTAL PROCEDURES**

### 326 **Mouse ES cell culture and differentiation**

327 *RGd2* ES cells were derived in 2i/LIF from heterozygous embryos (Kalkan et al., 2016).  
328 The *RGd2/T:mKO2* cell line was generated by targeting the endogenous T locus with  
329 T2A-mKO2. ES cells were routinely maintained on gelatine-coated plates (Sigma, cat.  
330 G1890) in N2B27 media (Stem Cells inc, SCS-SF-NB-02) supplemented with 1 $\mu$ M  
331 PD0325901 and 3 $\mu$ M Chir99021 (2i) without LIF, and passaged with Accutase  
332 (Millipore, SF006) every 2-3 days. For sorting experiments, cells were plated for 24hrs  
333 in 2i at 1.5x10<sup>4</sup> cells/cm<sup>2</sup> before washing once with PBS and changing the media to  
334 N2B27. After 24-26hrs, cells were sorted by flow cytometry according to GFP levels into  
335 Rex1-positive (highest 15%) and Rex1-negative (lowest 15%) populations using a  
336 MoFlo sorter (Beckman Coulter, inc). For neural differentiation, cells were plated at  
337 1.0x10<sup>4</sup> cells/cm<sup>2</sup> on laminin-coated dishes (Sigma-Aldrich, L2020) in N2B27. Medium  
338 was changed every other day. Definitive endoderm induction was as described  
339 (Morrison et al., 2015). Lateral mesoderm differentiation was performed by plating  
340 1.2x10<sup>4</sup> cells/cm<sup>2</sup> cells in collagen coated plates (BD BioCoat, 354591) in batch tested  
341 10% Serum medium (GMEM (Sigma-Aldrich, G5154), 10% FCS (Sigma-Aldrich), 1x  
342 NEAA (Life Technologies, 11140-050), 1mM sodium pyruvate (Life Technologies,  
343 11360-070), 1mM L-Glutamine (Life Technologies, 25030-081)) (Nishikawa et al.,  
344 1998).

345 ActivinA 10ng/ml and Chir99021 3 $\mu$ M (Gsk3(i)) treatment of sorted fractions was  
346 carried out on fibronectin-coated plates (Millipore, FC010) at 1.5x10<sup>4</sup> cells/cm<sup>2</sup>. Nodal  
347 inhibitor experiments were carried out using A8-301 1 $\mu$ M (Alk(i), Tocris Bioscience,  
348 2939) or DMSO (1:10000) as a carrier control.



349 Colony forming assays were conducted by plating 1000 cells per well in laminin-  
350 coated 6 well plates in 2i supplemented with 100U/ml LIF to maximise self-renewal  
351 potential (Wray et al., 2011). After 5 days, cells were stained using alkaline  
352 phosphatase kit (Sigma, cat. 86 R-1KT) and the number of colonies counted.

353 For transcription factor induction of PGCLC, the tri-cistronic Ap2g-T2A-Prdm14-P2A-  
354 Blimp1 fragment (APB1, kind gift from Toshihiro Kobayashi and Azim Surani) was  
355 cloned into phCMV\*1-cHA-IRES-H2BBFP plasmid. pPyCAG-PBase, pPBCAG-rtTA-IN  
356 and phCMV\*1-APB-IRES-H2BBFP were co-transfected into *RGd2* cells by TransIT-LT1  
357 (Kinoshita et al., 2015). G418 selection (400 µg/ml) was started 48 hours after  
358 transfection and cells were replated at clonal density at 96 hours. For PGCLC induction,  
359 cells sorted at 24 hours for Rex1-GFP expression were plated at 3,000 cells per well in  
360 a 96 round-bottomed well plate with (Nakaki et al., 2013) in the presence or absence of  
361 1µg/ml Doxycycline (Sigma-Aldrich). Cells were fed every other day. Aggregates  
362 collected on day 2 and 4 for RT-qPCR or fixed after 4 days in culture.

363

### 364 **Flow cytometry analysis of fluorescent reporters**

365 Cells were dissociated into a single cell suspension using Accutase and resuspended in  
366 PBS+5% FBS for analysis using a BD LSR Fortessa Analyser.

367

### 368 **Immunohistochemistry**

369 Samples were fixed with 4% PFA for 10min at room temperature (RT), permeabilised  
370 and blocked for 2hrs with block buffer (PBS+0.03%TritonX+3% donkey serum). Cells  
371 were incubated overnight at 4 °C in block buffer with the following primary antibodies:  
372 Sox1 (Cell Signalling, 4194, 1:200), Oct4 (Santa Cruz, sc-5279 or sc-8628, 1:400),

373 Nanog (eBioscience, 14-5761-80, 1:200), Klf4 (Abcam, ab72543, 1:300), Tuj1 (R&D,  
374 MAB1195, 1:500), Foxa2 (Abcam, ab40874, 1:200), Sox17 (R&D, AF1924, 1:200), T  
375 (R&D, AF2085, 1:200), Esrrb (Perseus, PP-H6705-00, 1:300), mKO2 (Amalgaam-MBL,  
376 M168-3, 1:1000), Blimp1 (eBiosciences, 14-5963-82). After three washes with  
377 PBS+0.03%TritonX, cells were incubated with secondary antibodies (Life Technologies,  
378 1:1000) and DAPI in blocking buffer for 3hrs in the dark. After three washes with  
379 PBS+0.03%TritonX, cells were left in PBS before imaging. Images were acquired with  
380 Laica DMI3000 B inverted microscope and the fluorescence in single cells quantified  
381 using CellProfiler (Jones et al., 2008). The number of cells was normalised to the  
382 highest value obtained for a given biological replicate.

383

#### 384 **Immunostaining of surface markers for flow cytometry**

385 Cells were dissociated with enzyme-free Cell Dissociation Buffer (Life Technologies,  
386 13151-014) at 37 °C. Cells were resuspended with staining buffer (PBS+1% Rat serum)  
387 and incubated with directly conjugated antibodies for 30min at 4 °C in the dark. After  
388 three washes with staining buffer, cells were analysed on an LSR Fortessa (BD  
389 Biosciences). Spherotech beads were used to quantify the number of cells. The  
390 following antibodies were used: Ecadherin-eFluo660 (eBioscience, 50-3249-82), Cxcr4  
391 (BD Biosciences, 552967 or 558644), Flk1 (BD Biosciences, 562941).

392

#### 393 **Gene expression analysis**

394 RNA isolation from cell populations was performed with RNAeasy kit (Qiagen).  
395 SuperScriptIII (Invitrogen) and oligo-dT primers were used to synthesise cDNA.  
396 TaqMan probes were used for *Pou5f1* (Oct4), *Sox2*, *Nanog*, *Esrrb*, *Zfp42* (Rex1), *Klf2*,

397 *Otx2*, *Fgf5*, *Pim2*, *Sox1* and *Dnmt3b*. UPL primers were used for *Pou3f1* (fw:  
398 catttttcgtttcgttttaccc, rv:gagcgcagaccctctctg, probe:72), *Smad2*  
399 (fw:aggacggttagatgagcttgag, rv: gtccccaatttcagagcaa, probe:9), *Tdgf1* (fw:  
400 gtttgaatttgaccggttg, rv:ggaaggcacaactggaaag, probe:93), *Nodal* (fw:  
401 ccaaccatgcctacatcca, rv:cacagcacgtggaaggaac, probe:40), *Lefty2* (fw:  
402 cacaagttggtccgtttcg, rv:ggtacctcggggtcacaat, probe:78), *Zic1* (fw: ggtacctcggggtcacaat,  
403 rv:cctcgaactcgcacttgaa, probe:7), *Pou3f3* (fw: tctgagaccgcccacaag, rv:  
404 gagcggcagtcagcaaag, probe:22).

405

#### 406 **Gene knockdown**

407 Qiagen FlexiTube siRNAs for *Nodal*, *Tdgf1*, *Smad2* and *Smad3* at a final concentration  
408 of 20nM were used for gene knockdown.  $1.5 \times 10^4$  cells/cm<sup>2</sup> were transfected in 24 well  
409 plates containing 500 $\mu$ l of medium 2i medium with 0.5 $\mu$ l Lipfectamine RNAiMAX (Life  
410 Technologies, 13778075) for. After overnight incubation, cells were washed once with  
411 PBS before transfer to N2B27. Efficiency of transfection was quantified by flow  
412 cytometry on Rex1GFPd2 cells transfected overnight with siRNA against GFP. Gene  
413 knockdown was quantified by RT-qPCR after overnight transfection.

414

#### 415 **Immunoblotting**

416 Western blotting was performed using standard techniques. The following primary  
417 antibodies were used: Smad2 (Cell Signalling 3101, 1:1000 in 1% milk), p-Smad2 (Cell  
418 Signalling, 3103, 1:1000 in 1% milk), anti-GAPDH (Sigma-Aldrich, G8795, 1:5000 in 1%  
419 milk). Peroxidase-conjugated secondary antibodies were used (Sigma-Aldrich, 1:5000).

420 Amersham ECL Western Blotting detection reagent (RPN2106) was used according to  
421 manufacturers instructions.

422

### 423 **Statistics**

424 ANOVA was used to compare three or more samples. Two-tailed Student's t test was  
425 used for pairwise comparisons. Kolmogorov-Smirnov test was used to determine  
426 statistical significance of endoderm differentiation mixing experiments.

427

### 428 **AUTHOR CONTRIBUTIONS**

429 C.M., T.K. and A.S. designed the experiments. C.M. performed the experiments,  
430 analysed the data and prepared figures. A.S. supervised the study. C.M. and A.S. wrote  
431 the paper.

432

### 433 **ACKNOWLEDGEMENTS**

434 We thank Andy Riddell and Nigel Miller for flow cytometry and FACS support and Peter  
435 Humphreys for imaging support. We also thank Martin Leeb for creating and validating  
436 the TmKO2 reporter and Masaki Kinoshita for targeting and validated the *Rex1::GFPd2*  
437 APB1 cell line. The APB1 construct was a kind gift from Toshihiro Kobayashi and Azim  
438 Surani. We thank Jennifer Nichols, Kevin Chalut, Graziano Martello and Harry Leitch for  
439 discussions and comments on the manuscript. This research was funded by the  
440 Wellcome Trust. The Cambridge Stem Cell Institute receives core support from the  
441 Wellcome Trust and the Medical Research Council. C.M. was funded by a BBSRC  
442 studentship. A.S. is a Medical Research Council Professor.

443 **REFERENCES**

444

- 445 Arnold, S.J., Robertson, E.J., 2009. Making a commitment: cell lineage allocation and  
446 axis patterning in the early mouse embryo. *Nat Rev Mol Cell Biol* 10, 91–103.  
447 doi:10.1038/nrm2618
- 448 Beck, S., Le Good, J.A., Guzman, M., Haim, N.B., Roy, K., Beermann, F., Constam,  
449 D.B., 2002. Extraembryonic proteases regulate Nodal signalling during gastrulation.  
450 *Nat Cell Biol* 4, 981–985. doi:10.1038/ncb890
- 451 Beddington, R., Robertson, E.J., 1998. Anterior patterning in mouse. *Trends in*  
452 *Genetics*.
- 453 Bertero, A., Madrigal, P., Galli, A., Hubner, N.C., Moreno, I., Burks, D., Brown, S.,  
454 Pedersen, R.A., Gaffney, D., Mendjan, S., Pauklin, S., Vallier, L., 2015.  
455 Activin/Nodal signaling and NANOG orchestrate human embryonic stem cell fate  
456 decisions by controlling the H3K4me3 chromatin mark. *Genes Dev* 29, 702–717.  
457 doi:10.1101/gad.255984.114
- 458 Betschinger, J., Nichols, J., Dietmann, S., Corrin, P.D., Paddison, P.J., Smith, A., 2013.  
459 Exit from pluripotency is gated by intracellular redistribution of the bHLH  
460 transcription factor Tfe3. *Cell* 153, 335–347. doi:10.1016/j.cell.2013.03.012
- 461 Boroviak, T., Loos, R., Bertone, P., Smith, A., Nichols, J., 2014. The ability of inner-cell-  
462 mass cells to self-renew as embryonic stem cells is acquired following  
463 epiblast specification. *Nat Cell Biol*. doi:10.1038/ncb2965
- 464 Boroviak, T., Loos, R., Lombard, P., Okahara, J., Behr, R., Sasaki, E., Nichols, J.,  
465 Smith, A., Bertone, P., 2015. Lineage-Specific Profiling Delineates the Emergence  
466 and Progression of Naive Pluripotency in Mammalian Embryogenesis.  
467 *Developmental Cell* 35, 366–382. doi:10.1016/j.devcel.2015.10.011
- 468 Brennan, J., Lu, C.C., Norris, D.P., Rodriguez, T.A., Beddington, R.S., Robertson, E.J.,  
469 2001. Nodal signalling in the epiblast patterns the early mouse embryo. *Nature* 411,  
470 965–969. doi:10.1038/35082103
- 471 Buecker, C., Srinivasan, R., Wu, Z., Calo, E., Acampora, D., Faial, T., Simeone, A., Tan,  
472 M., Swigut, T., Wysocka, J., 2014. Reorganization of Enhancer Patterns in  
473 Transition from Naive to Primed Pluripotency. *Stem Cell* 14, 838–853.  
474 doi:10.1016/j.stem.2014.04.003
- 475 Burtscher, I., Lickert, H., 2009. Foxa2 regulates polarity and epithelialization in the  
476 endoderm germ layer of the mouse embryo. *Development* 136, 1029–1038.  
477 doi:10.1242/dev.028415
- 478 Camus, A., Perea-Gomez, A., Moreau, A., Collignon, J., 2006. Absence of Nodal  
479 signaling promotes precocious neural differentiation in the mouse embryo. *Dev Biol*  
480 295, 743–755. doi:10.1016/j.ydbio.2006.03.047
- 481 Choi, H.W., Joo, J.Y., Hong, Y.J., Kim, J.S., Song, H., Lee, J.W., Wu, G., Schöler, H.R.,  
482 Do, J.T., 2016. Distinct Enhancer Activity of Oct4 in Naive and Primed Mouse  
483 Pluripotency. *Stem Cell Reports* 7, 911–926. doi:10.1016/j.stemcr.2016.09.012
- 484 Conlon, F.L., Barth, K.S., Robertson, E.J., 1991. A novel retrovirally induced embryonic  
485 lethal mutation in the mouse: assessment of the developmental fate of embryonic  
486 stem cells homozygous for the 413.d proviral integration. *Development* 111, 969–  
487 981.
- 488 Conlon, F.L., Lyons, K.M., Takaesu, N., Barth, K.S., Kispert, A., Herrmann, B.,

- 489 Robertson, E.J., 1994. A primary requirement for nodal in the formation and  
490 maintenance of the primitive streak in the mouse. *Development* 120, 1919–1928.
- 491 Dunn, S.-J., Martello, G., Yordanov, B., Emmott, S., Smith, A.G., 2014. Defining an  
492 essential transcription factor program for naïve pluripotency. *Science* 344, 1156–  
493 1160. doi:10.1126/science.1248882
- 494 Fiorenzano, A., Pascale, E., Aniello, C.D.A., Acampora, D., Bassalart, C., Russo, F.,  
495 Andolfi, G., Biffoni, M., Francescangeli, F., Zeuner, A., Angelini, C., Chazaud, C.,  
496 Patriarca, E.J., Fico, A., Minchiotti, G., 2016. Cripto is essential to capture mouse  
497 epiblast stem cell and human embryonic stem cell pluripotency. *Nature*  
498 *Communications* 7, 1–16. doi:10.1038/ncomms12589
- 499 Gadue, P., Huber, T.L., Paddison, P.J., Keller, G.M., 2006. Wnt and TGF-beta signaling  
500 are required for the induction of an in vitro model of primitive streak formation using  
501 embryonic stem cells. *Proc Natl Acad Sci USA* 103, 16806–16811.  
502 doi:10.1073/pnas.0603916103
- 503 Gardner, R.L., 1975. Analysis of determination and differentiation in the early  
504 mammalian embryo using intra- and interspecific chimeras. *Symp Soc Dev Biol*  
505 207–236.
- 506 Guzman-Ayala, M., Ben-Haim, N., Beck, S., Constam, D.B., 2004. Nodal protein  
507 processing and fibroblast growth factor 4 synergize to maintain a trophoblast stem  
508 cell microenvironment. *Proc Natl Acad Sci USA* 101, 15656–15660.  
509 doi:10.1073/pnas.0405429101
- 510 Habibi, E., Brinkman, A.B., Arand, J., Kroeze, L.I., Kerstens, H.H.D., Matarese, F.,  
511 Lepikhov, K., Gut, M., Brun-Heath, I., Hubner, N.C., Benedetti, R., Altucci, L.,  
512 Jansen, J.H., Walter, J., Gut, I.G., Marks, H., Stunnenberg, H.G., 2013. Whole-  
513 genome bisulfite sequencing of two distinct interconvertible DNA methylomes of  
514 mouse embryonic stem cells. *Cell Stem Cell* 13, 360–369.  
515 doi:10.1016/j.stem.2013.06.002
- 516 Hayashi, K., Ohta, H., Kurimoto, K., Aramaki, S., Saitou, M., 2011. Reconstitution of the  
517 mouse germ cell specification pathway in culture by pluripotent stem cells. *Cell* 146,  
518 519–532. doi:10.1016/j.cell.2011.06.052
- 519 Jones, T.R., Kang, I.H., Wheeler, D.B., Lindquist, R.A., Papallo, A., Sabatini, D.M.,  
520 Golland, P., Carpenter, A.E., 2008. CellProfiler Analyst: data exploration and  
521 analysis software for complex image-based screens. *BMC Bioinformatics*.  
522 doi:10.1186/1471-2105-9-482
- 523 Kalkan, T., Olova, N., Roode, M., Mulas, C., Lee, H.J., Nett, I., Marks, H., Walker, R.,  
524 Stunnenberg, H.G., Lilley, K., Nichols, J., Reik, W., Bertone, P., Smith, A., 2016.  
525 Tracking the embryonic stem cell transition from ground state pluripotency 1–31.  
526 doi:10.1101/092510
- 527 Kalkan, T., Smith, A., 2014. Mapping the route from naive pluripotency to lineage  
528 specification. *Philosophical Transactions of the Royal Society B: Biological Sciences*  
529 369. doi:10.1098/rstb.2013.0540
- 530 Kinoshita, M., Shimosato, D., Yamane, M., Niwa, H., 2015. Sox7 is dispensable for  
531 primitive endoderm differentiation from mouse ES cells. *BMC Dev Biol* 15, 1.  
532 doi:10.1186/s12861-015-0079-4
- 533 Kunath, T., Saba-Ei-Leil, M.K., Almousailleakh, M., Wray, J., Meloche, S., Smith, A.,  
534 2007. FGF stimulation of the Erk1/2 signalling cascade triggers transition of  
535 pluripotent embryonic stem cells from self-renewal to lineage commitment.  
536 *Development* 134, 2895–2902. doi:10.1242/dev.02880

- 537 Kurimoto, K., Yabuta, Y., Ohinata, Y., Shigeta, M., Yamanaka, K., Saitou, M., 2008.  
538 Complex genome-wide transcription dynamics orchestrated by Blimp1 for the  
539 specification of the germ cell lineage in mice. *Genes Dev* 22, 1617–1635.  
540 doi:10.1101/gad.1649908
- 541 Lee, M.K., Tuttle, J.B., Rebhun, L.I., Cleveland, D.W., Frankfurter, A., 1990. The  
542 expression and posttranslational modification of a neuron-specific beta-tubulin  
543 isotype during chick embryogenesis. *Cell Motil. Cytoskeleton* 17, 118–132.  
544 doi:10.1002/cm.970170207
- 545 Leeb, M., Dietmann, S., Paramor, M., Niwa, H., Smith, A., 2014. Genetic exploration of  
546 the exit from self-renewal using haploid embryonic stem cells. *Cell Stem Cell* 14,  
547 385–393. doi:10.1016/j.stem.2013.12.008
- 548 Leitch, H.G., McEwen, K.R., Turp, A., Encheva, V., Carroll, T., Grabole, N., Mansfield,  
549 W., Nashun, B., Knezovich, J.G., Smith, A., Surani, M.A., Hajkova, P., 2013. Naive  
550 pluripotency is associated with global DNA hypomethylation. *Nat Struct Mol Biol.*  
551 doi:10.1038/nsmb.2510
- 552 Lu, C.C., Robertson, E.J., 2004. Multiple roles for Nodal in the epiblast of the mouse  
553 embryo in the establishment of anterior-posterior patterning. *Developmental Biology*  
554 273, 149–159. doi:10.1016/j.ydbio.2004.06.004
- 555 Magnúsdóttir, E., Dietmann, S., Murakami, K., Günesdogan, U., Tang, F., Bao, S.,  
556 Diamanti, E., Lao, K., Göttgens, B., Azim Surani, M., 2013. A tripartite transcription  
557 factor network regulates primordial germ cell specification in mice. *Nat Cell Biol* 15,  
558 905–915. doi:10.1038/ncb2798
- 559 Magnúsdóttir, E., Gillich, A., Grabole, N., Surani, M.A., 2012. Combinatorial control of  
560 cell fate and reprogramming in the mammalian germline. *Curr Opin Genet Dev* 22,  
561 466–474. doi:10.1016/j.gde.2012.06.002
- 562 Marks, H., Kalkan, T., Menafrá, R., Denissov, S., Jones, K., Hofemeister, H., Nichols, J.,  
563 Kranz, A., Stewart, A.F., Smith, A., Stunnenberg, H.G., 2012. The Transcriptional  
564 and Epigenomic Foundations of Ground State Pluripotency. *Cell* 149, 590–604.  
565 doi:10.1016/j.cell.2012.03.026
- 566 Martello, G., Smith, A., 2014. The nature of embryonic stem cells. *Annu Rev Cell Dev*  
567 *Biol* 30, 647–675. doi:10.1146/annurev-cellbio-100913-013116
- 568 Matulka, K., Lin, H.H., Hříbková, H., Uwanogho, D., Dvořák, P., 2013. PTP1B Is an  
569 Effector of Activin Signaling and Regulates Neural Specification of Embryonic Stem  
570 Cells. *Cell Stem Cell*.
- 571 Mesnard, D., Donnison, M., Fuerer, C., Pfeffer, P.L., Constam, D.B., 2011. The  
572 microenvironment patterns the pluripotent mouse epiblast through paracrine Furin  
573 and Pace4 proteolytic activities. *Genes Dev* 25, 1871–1880.  
574 doi:10.1101/gad.16738711
- 575 Mesnard, D., Guzman-Ayala, M., Constam, D.B., 2006. Nodal specifies embryonic  
576 visceral endoderm and sustains pluripotent cells in the epiblast before overt axial  
577 patterning. *Development* 133, 2497–2505. doi:10.1242/dev.02413
- 578 Morrison, G., Scognamiglio, R., Trumpp, A., Smith, A., 2015. Convergence of cMyc  
579 and -catenin on Tcf7l1 enables endoderm specification. *EMBO J* 1–13.  
580 doi:10.15252/embj.201592116
- 581 Morrison, G.M., Oikonomopoulou, I., Migueles, R.P., Soneji, S., Livigni, A., Enver, T.,  
582 Brickman, J.M., 2008. Anterior definitive endoderm from ESCs reveals a role for  
583 FGF signaling. *Cell Stem Cell* 3, 402–415. doi:10.1016/j.stem.2008.07.021
- 584 Mullen, A.C., Orlando, D.A., Newman, J.J., Lovén, J., Kumar, R.M., Bilodeau, S.,

- 585 Reddy, J., Guenther, M.G., DeKoter, R.P., Young, R.A., 2011. Master transcription  
586 factors determine cell-type-specific responses to TGF- $\beta$  signaling. *Cell* 147, 565–  
587 576. doi:10.1016/j.cell.2011.08.050
- 588 Nakaki, F., Hayashi, K., Ohta, H., Kurimoto, K., Yabuta, Y., Saitou, M., 2013. Induction  
589 of mouse germ-cell fate by transcription factors in vitro. *Nature* 501, 222–226.  
590 doi:10.1038/nature12417
- 591 Nichols, J., Smith, A., 2012. Pluripotency in the embryo and in culture. *Cold Spring*  
592 *Harbor Perspectives in Biology* 4, a008128–a008128.  
593 doi:10.1101/cshperspect.a008128
- 594 Nishikawa, S.I., Nishikawa, S., Hirashima, M., Matsuyoshi, N., Kodama, H., 1998.  
595 Progressive lineage analysis by cell sorting and culture identifies FLK1+VE-  
596 cadherin+ cells at a diverging point of endothelial and hemopoietic lineages.  
597 *Development* 125, 1747–1757.
- 598 Niwa, H., Yamamura, K., Miyazaki, J., 1991. Efficient selection for high-expression  
599 transfectants with a novel eukaryotic vector. *Gene* 108, 193–199. doi:10.1016/0378-  
600 1119(91)90434-D
- 601 Ogawa, K., Matsui, H., Ohtsuka, S., Niwa, H., 2004. A novel mechanism for regulating  
602 clonal propagation of mouse ES cells. *Genes to Cells* 9, 471–477.  
603 doi:10.1111/j.1356-9597.2004.00736.x
- 604 Ogawa, K., Saito, A., Matsui, H., Suzuki, H., Ohtsuka, S., Shimosato, D., Morishita, Y.,  
605 Watabe, T., Niwa, H., Miyazono, K., 2007. Activin-Nodal signaling is involved in  
606 propagation of mouse embryonic stem cells. *J Cell Sci* 120, 55–65.  
607 doi:10.1242/jcs.03296
- 608 Peng, G., Suo, S., Chen, J., Chen, W., Liu, C., Yu, F., Wang, R., Chen, S., Sun, N., Cui,  
609 G., Song, L., Tam, P.P.L., Han, J.-D.J., Jing, N., 2016. Spatial Transcriptome for the  
610 Molecular Annotation of Lineage Fates and Cell Identity in Mid-gastrula Mouse  
611 Embryo. *Developmental Cell* 36, 681–697. doi:10.1016/j.devcel.2016.02.020
- 612 Pevny, L.H., Sockanathan, S., Placzek, M., Lovell-Badge, R., 1998. A role for SOX1 in  
613 neural determination. *Development* 125, 1967–1978.
- 614 Robertson, E.J., 2014. Dose-dependent Nodal/Smad signals pattern the early mouse  
615 embryo. *Seminars in cell & developmental biology*.
- 616 Rossant, J., 1975. Investigation of the determinative state of the mouse inner cell mass.  
617 *Development* 33, 979–990.
- 618 Rossant, J., Tam, P., 2009. Blastocyst lineage formation, early embryonic asymmetries  
619 and axis patterning in the mouse. *Development* 136, 701–713. doi:10.1242/dev.017178  
620 10.1242/dev.017178
- 621 Smith, A.G., *in press*. Formative pluripotency: the executive phase in a developmental  
622 continuum.
- 623 Stavridis, M.P., Lunn, J.S., Collins, B.J., Storey, K.G., 2007. A discrete period of FGF-  
624 induced Erk1/2 signalling is required for vertebrate neural specification.  
625 *Development* 134, 2889–2894. doi:10.1242/dev.02858
- 626 Thomas, P., Beddington, R., 1996. Anterior primitive endoderm may be responsible for  
627 patterning the anterior neural plate in the mouse embryo. *Current Biology* 6, 1487–  
628 1496.
- 629 Tojo, M., Hamashima, Y., Hanyu, A., Kajimoto, T., Saitoh, M., Miyazono, K., Node, M.,  
630 Imamura, T., 2005. The ALK-5 inhibitor A-83-01 inhibits Smad signaling and  
631 epithelial-to-mesenchymal transition by transforming growth factor-beta. *Cancer Sci.*  
632 96, 791–800. doi:10.1111/j.1349-7006.2005.00103.x



- 633 Toyooka, Y., Shimosato, D., Murakami, K., Takahashi, K., Niwa, H., 2008. Identification  
634 and characterization of subpopulations in undifferentiated ES cell culture.  
635 *Development* 135, 909–918. doi:135/5/909 [pii]  
636 10.1242/dev.017400
- 637 Tsakiridis, A., Huang, Y., Blin, G., Skylaki, S., Wymeersch, F., Osorno, R., Economou,  
638 C., Karagianni, E., Zhao, S., Lowell, S., Wilson, V., 2014. Distinct Wnt-driven  
639 primitive streak-like populations reflect *in vivo* lineage precursors. *Development* 141,  
640 1209–1221. doi:10.1242/dev.101014
- 641 Turner, D.A., Trott, J., Hayward, P., Rué, P., Martinez Arias, A., 2014. An interplay  
642 between extracellular signalling and the dynamics of the exit from pluripotency  
643 drives cell fate decisions in mouse ES cells. *Biology Open* 3, 614–626.  
644 doi:10.1242/bio.20148409
- 645 Wray, J., Kalkan, T., Gomez-Lopez, S., Eckardt, D., Cook, A., Kemler, R., Smith, A.,  
646 2011. Inhibition of glycogen synthase kinase-3 alleviates Tcf3 repression of the  
647 pluripotency network and increases embryonic stem cell resistance to differentiation.  
648 *Nat Cell Biol* 13, –845. doi:10.1038/ncb2267
- 649 Wray, J., Kalkan, T., Smith, A., 2010. The ground state of pluripotency. *Biochem Soc*  
650 *Trans* 38, 1027–1032. doi:BST0381027 [pii]  
651 10.1042/BST0381027
- 652 Yamashita, J., Itoh, H., Hirashima, M., Ogawa, M., Nishikawa, S., Yurugi, T., Naito, M.,  
653 Nakao, K., 2000. Flk1-positive cells derived from embryonic stem cells serve as  
654 vascular progenitors. *Nature* 408, 92–96. doi:10.1038/35040568
- 655 Yang, S.-H., Kalkan, T., Morrisroe, C., Smith, A., Sharrocks, A.D., 2012. A genome-wide  
656 RNAi screen reveals MAP kinase phosphatases as key ERK pathway regulators  
657 during embryonic stem cell differentiation. *PLoS Genet* 8, e1003112.  
658 doi:10.1371/journal.pgen.1003112
- 659 Yasunaga, M., Tada, S., Torikai-Nishikawa, S., Nakano, Y., Okada, M., Jakt, L.M.,  
660 Nishikawa, S., Chiba, T., Era, T., Nishikawa, S.-I., 2005. Induction and monitoring of  
661 definitive and visceral endoderm differentiation of mouse ES cells. *Nat Biotechnol*  
662 23, 1542–1550. doi:10.1038/nbt1167
- 663 Ying, Q., Wray, J., Nichols, J., Battle-Morera, L., Doble, B., Woodgett, J., Cohen, P.,  
664 Smith, A., 2008. The ground state of embryonic stem cell self-renewal. *Nature* 453,  
665 519–523. doi:nature06968 [pii]  
666 10.1038/nature06968
- 667 Ying, Q.-L., Stavridis, M., Griffiths, D., Li, M., Smith, A., 2003. Conversion of embryonic  
668 stem cells into neuroectodermal precursors in adherent monoculture., *Nature*  
669 *biotechnology*. doi:10.1038/nbt780
- 670 Zhang, K., Li, L., Huang, C., Shen, C., Tan, F., Xia, C., Liu, P., Rossant, J., Jing, N.,  
671 2010. Distinct functions of BMP4 during different stages of mouse ES cell neural  
672 commitment. *Development* 137, 2095–2105. doi:10.1242/dev.049494
- 673 Zhou, X., Sasaki, H., Lowe, L., Hogan, B.L., Kuehn, M.R., 1993. Nodal is a novel TGF-  
674 beta-like gene expressed in the mouse node during gastrulation. *Nature* 361, 543–  
675 547. doi:10.1038/361543a0
- 676 Zylicz, J.J., Dietmann, S., Günesdogan, U., Hackett, J.A., 2015. Chromatin dynamics  
677 and the role of G9a in gene regulation and enhancer silencing during early mouse  
678 development. *eLife*. doi:10.7554/eLife.09571.001  
679  
680

681 **FIGURE LEGENDS**

682 **Figure 1. Acquisition of PGC-LC differentiation capacity**

683 (A) Experimental set up for transcription-factor dependent PGC-like cell specification.

684 (B) Expression of Blimp1 and Oct4 in day 4 aggregates differentiated in the presence or  
685 absence of Dox to induce transcription factor overexpression. Scale bar: 60 $\mu$ m

686 (C) Zoom in of the expression of Blimp1 and Oct4 in day 4 aggregates differentiated in  
687 the presence or absence of Dox to induce transcription factor overexpression. Arrow  
688 heads show overexpression artefacts. Scale bar: 20 $\mu$ m

689 (D) Quantification of the Blimp1 staining on day 4 in aggregates after addition of Dox.

690 (E) RT-qPCR of endogenous PGC-associated transcripts.

691 Mean and SD for 2 independent experiments shown, \*p<0.01, \*\*p<0.001 (Student t  
692 test).

693 See also Figure S1

694

695 **Figure 2. Multilineage differentiation capacity is manifest in Rex1-negative cells**

696 (A) Experimental set up and sample analysis for ActivinA+GSK3(i) treatment. Histogram  
697 shows the percentages of cells expressing *T:mKO2* or *RGd2* (B).

698 (C) Experimental set up and sample analysis for lateral mesoderm differentiation.  
699 Histogram showing the percentage of Flk1+/Ecadh- cells.

700 (D) Experimental set up and sample analysis for definitive endoderm differentiation.

701 (E) Percentage of Cxcr4+/Ecadh+ double positive cells.

702 (F) Normalised number of cells during definitive endoderm differentiation. The number  
703 of cells was normalised to the highest value obtained in that biological replicate.

704 (G) Single cell analysis during definitive endoderm differentiation by seeding  
705 fluorescently labelled Rex1-High or Rex1-Low cells at clonal density amongst unlabelled  
706 cells.

707 (H) Number of clones after 4 days of differentiation.

708 (I) Histogram showing the distribution of the percentage of Sox17 positive cells per  
709 clone. Two independent experiments, all data shown.

710 (J) Histogram showing the distribution of the number of cells per clone. Two  
711 independent experiments, all data shown.

712 (K) Experimental set up and sample analysis for neural differentiation. Histogram  
713 showing the percentage of Sox1-positive cells during the differentiation time-course.

714 Unless stated, mean and SD for 3 independent experiments shown, \*  $p < 0.05$ , \*\* $p < 0.01$ .

715 See also Figure S2.

716

717

718 **Figure 3. Inhibition of endogenous Nodal signalling does not affect exit from the**  
719 **naïve state**

720 (A) Experimental set up

721 (B) Relative expression of pluripotency factors *Klf2* and *Nanog* over time when cells are  
722 differentiated in DMSO or Alk(i).

723 (C) Percentage of Klf4 and Nanog positive cells over time after 2i withdrawal when cells  
724 are differentiate in the presence of DMSO or Alk(i).

725 (D) Self-renewal capacity declines at a comparable rate for cells treated with DMSO  
726 vehicle or Alk(i).

727 (E) Relative expression of post-implantation markers *Fgf5* and *Otx2* shows faster earlier  
728 downregulated for cells treated with Alk(i) over DMSO controls.

729 (F) Relative expression of neural-associated genes *Sox1*, *Zic1* and *Pou3f3* over time  
730 when cells are differentiated in DMSO or Alk(i).

731 (G) Inhibition of Nodal signalling results in accelerated reduction of Oct4 protein and  
732 increase in Sox1 protein at day 3 of differentiation.

733 Mean and SD for 2 independent experiments shown. See also Figure S3.

734

735 **Figure 4. Nodal signalling during exit from the naïve state prevents preconscious**  
736 **neutralisation.**

737 (A) Inhibition of Nodal signalling with Alk(i) in Rex1-positive and Rex1-negative sorted  
738 fractions. Graphs show percentage of Sox1 positive cells after sort.

739 (B) Percentage of Sox1 positive cells arising from Rex1-negative cells following DMSO  
740 (control) or Alk(i) treatment.

741 (C) Number of cells over the period analysed in B.

742 (D) ActivinA/Gsk3(i) induction of Alk(i) or control treated Rex1-negative cells. Numbers  
743 of TmKO2 positive cells, along with total cell numbers (E).

744 To determine the normalised number of cells as a percentage for each biological  
745 replicate, the number of cells was normalised by the highest value obtained in that  
746 biological replicate.

747 (F) Experimental set up of definitive endoderm clonal assay.

748 (G) Histogram showing the distribution of the percentage of Sox17 positive cells per  
749 clone. Two independent experiments, all data shown.

750 (H) Histogram showing the distribution of the number of cells per clone. Two  
751 independent experiments, all data shown.

752 Unless states, mean and SD for 3 independent experiments shown, \*  $p < 0.05$ , \*\*  $p < 0.01$ .

753 (I) Experimental set up of transcription-factor dependent PGC-LC differentiation. Images  
754 show day 4 cultures in the presence of Dox from Alk(i)-treated and control cells. Scale  
755 bar=1mm.

756 (J) RT-qPCR of PGC-associated genes during induction process. Mean and SD for 2  
757 independent experiments shown, \*  $p < 0.05$ ,  $p < 0.001$ . See also Figure S4.

758

## 759 **SUPPLEMENTARY FIGURE LEGENDS**

### 760 **Figure S1**

761 (A) Flow cytometry histogram of RGd2 cells after removal of 2i.

762 (B) Experimental set up for sorting experiments.

763 (C) Flow cytometry profile of sorted fractions

764 (D) Replating capacity of 2i, 24hrs Rex1-positive and 24hrs Rex1-negative cells in 2i/LIF  
765 media.

766 (E) Replating capacity of 2i, 24hrs Rex1-positive and 24hrs Rex1-negative cells in  
767 Serum/Lif media.

768 (F) Quantification of Oct4 immunostaining in day 4 aggregates in the presence of Dox.

769 Mean and SD for 3 independent experiments shown.

770

### 771 **Figure S2**

772 (A) Flow cytometry plots of Rex1GFPd2+TmKO2 cells in 2i, and Rex1-positive sorted  
773 cells for 3 days in control or ActivinA+GSK3(i).

774 (B) Percentage of cells staining positive for Sox17 and Foxa2 during definitive  
775 endoderm differentiation.

776 (C) Normalised number of cells during neural differentiation.

777 (D) Immunostaining for Sox1 and Tuj1 of 2i, Rex1-positive and Rex1-negative cells after  
778 6 and 8 days of differentiation.

779 To determine the normalised number of cells as a percentage for each biological  
780 replicate, the number of cells was normalised by the highest value obtained in that  
781 biological replicate.

782 Mean and SD for three independent experiments shown.

783

### 784 **Figure S3**

785 (A) Western blot showing p-Smad2, Smad2 and Gapdh protein in cells treated with  
786 control or Alk(i) for 30min.

787 (B) Number of colonies of ES cells grown in 2i+DMSO or 2i+Alk(i) for three passages.  
788 Mean and SD for two independent experiments is shown.

789 (C) RT-qPCR of *Nodal*, *Tdgf1* and *Smad2/3* siRNA treated cells after overnight  
790 transfection in 2i. siRNA knockdown did not affect the expression of pluripotency genes  
791 *Pou5f1*, *Klf4* or *Nanog* but in some cases it did affect the expression of the Nodal  
792 signalling target *Lefty2*.

793 (D) Quantification of the number of Oct4/Sox2 double positive cells, Oct4 negative/Sox2  
794 positive and Sox2/Sox1 double positive cells on day 3 of neural differentiation after  
795 treatment with siRNA. Mean and SD for two independent experiments is shown. \* p  
796 <0.05, \*\* p<0.01

797

798 **Figure S4**

799 (A) Expression of Nodal pathway signalling components in 2i, Rex1-positive and Rex1-  
800 negative cells (Kalkan et al.).

801 (B) Nodal inhibition before and during downregulation of Rex1 – Flow cytometry plot of  
802 Rex1GFPd2 cells differentiated for 24hrs in Alk(i) or control (DMSO).

803 (C) Relative expression of pluripotency and differentiation factors in Rex1-negative cells  
804 arising from control or Alk(i) conditions by RT-qPCR. 2i and Rex1-positive cells are  
805 included as controls.

806 (D) Expression of *Sox1* in the sorted fractions.

807 (E) Percentage of TmKO2 positive cells during ActivinA/Gsk3(i) treatment of Control or  
808 Alk(i) derived Rex1-negative cells. Mean and SD for 3 independent experiments shown,  
809 \*p<0.05.

810 (F) Lateral mesoderm differentiation of 24hrs Alk(i) or control treated Rex1-negative  
811 cells.

812 (G) Percentage of Flk1+/Ecadh- cells.

813 (H) Histogram showing the normalised number of cells.

814 (I) Number of clones after 4 days of definitive endoderm differentiation.

815 To determine the normalised number of cells as a percentage for each biological  
816 replicate, the number of cells was normalised by the highest value obtained in that  
817 biological replicate. Mean and SD for 3 independent experiments shown, \*p<0.05.

# Figure 1

## A Transcription factor-dependent PGC-like cell induction

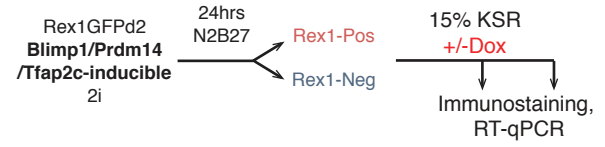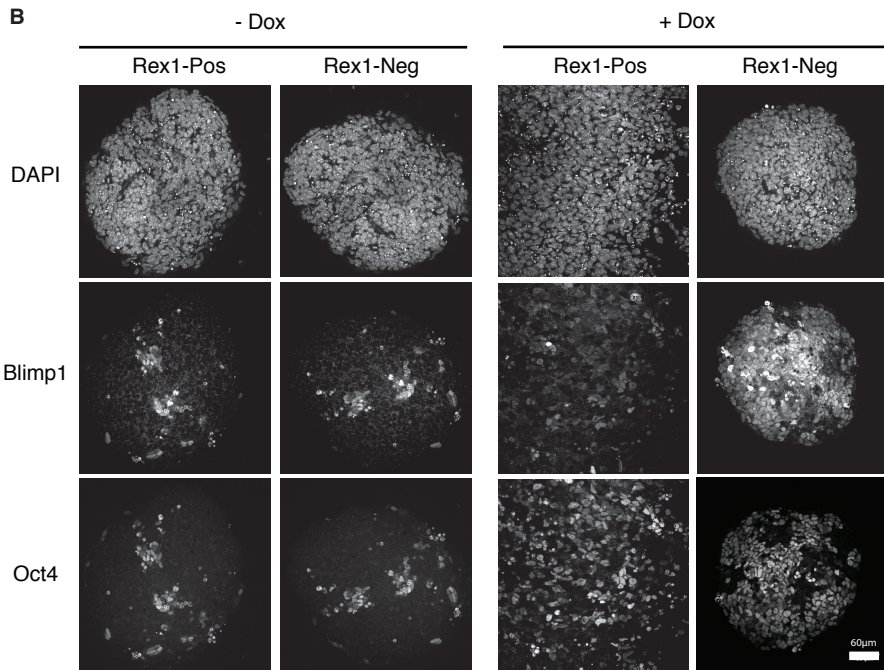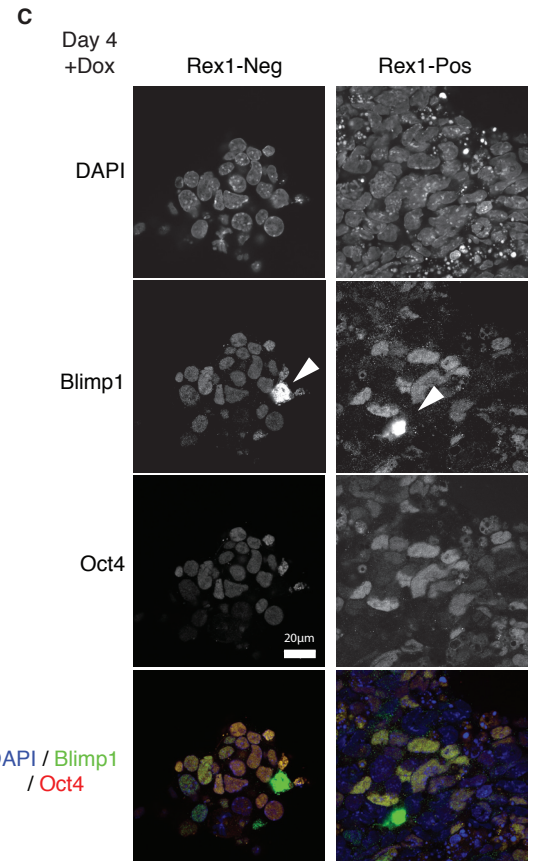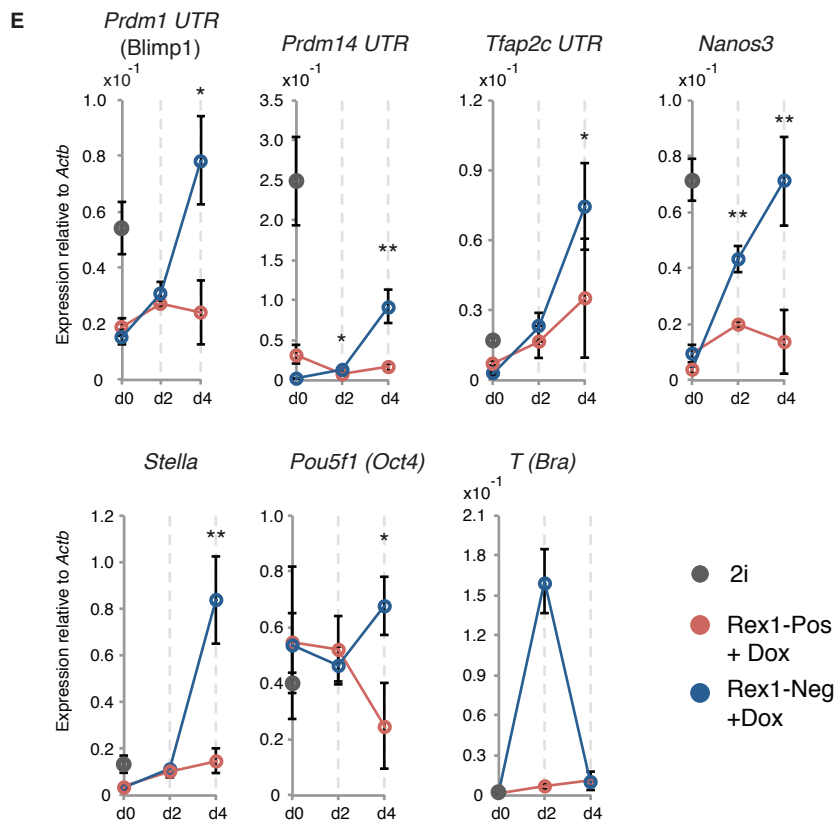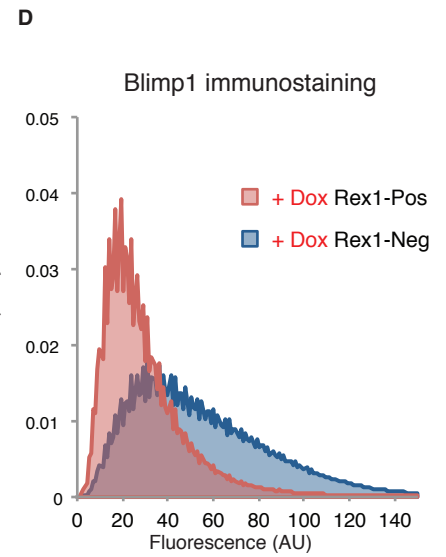



## Figure 2

### A ActivinA/Gsk3(i)

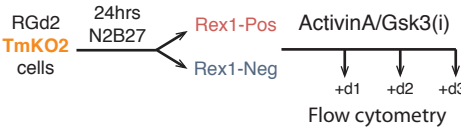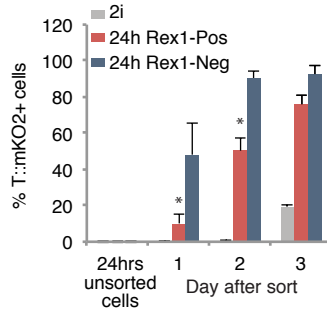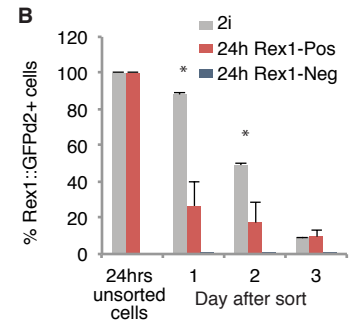

### C Lateral Mesoderm

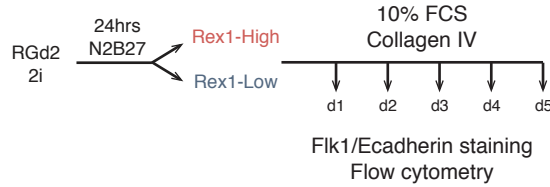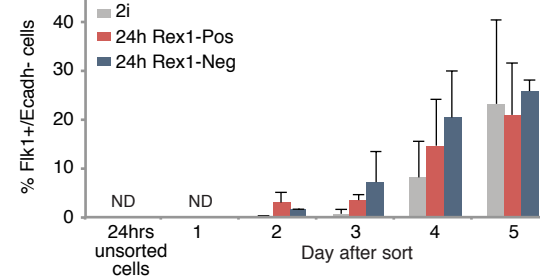

### D Definitive endoderm

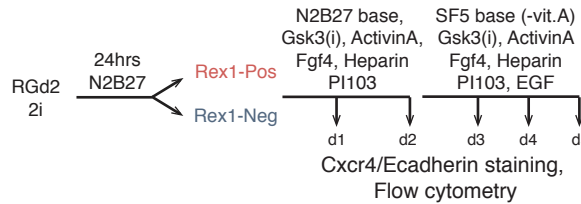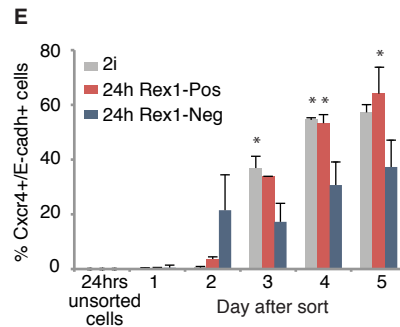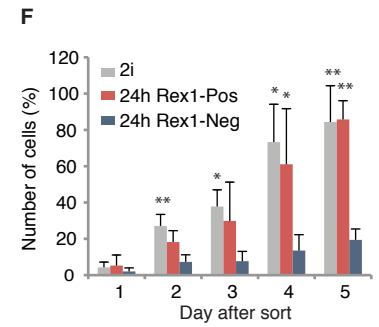

### G Clonal definitive endoderm

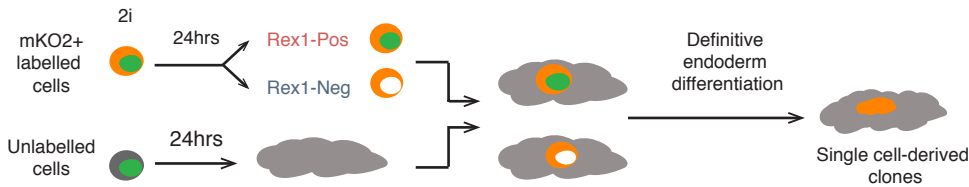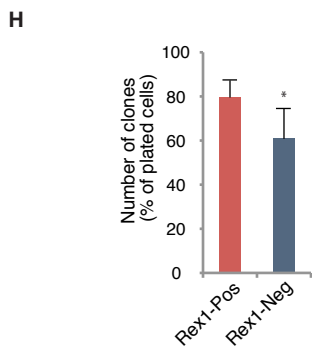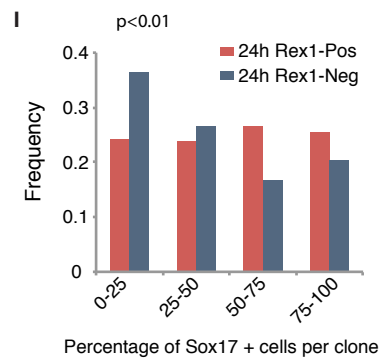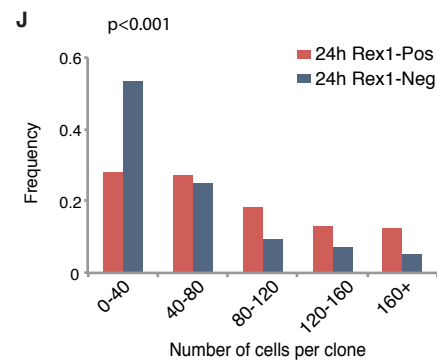

### K Neural

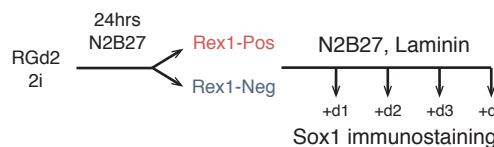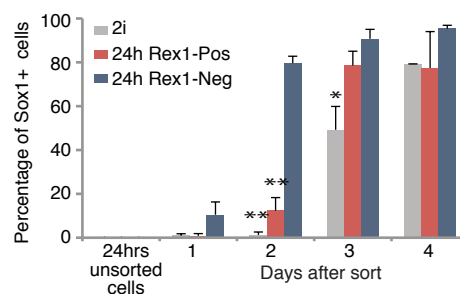

### Figure 3

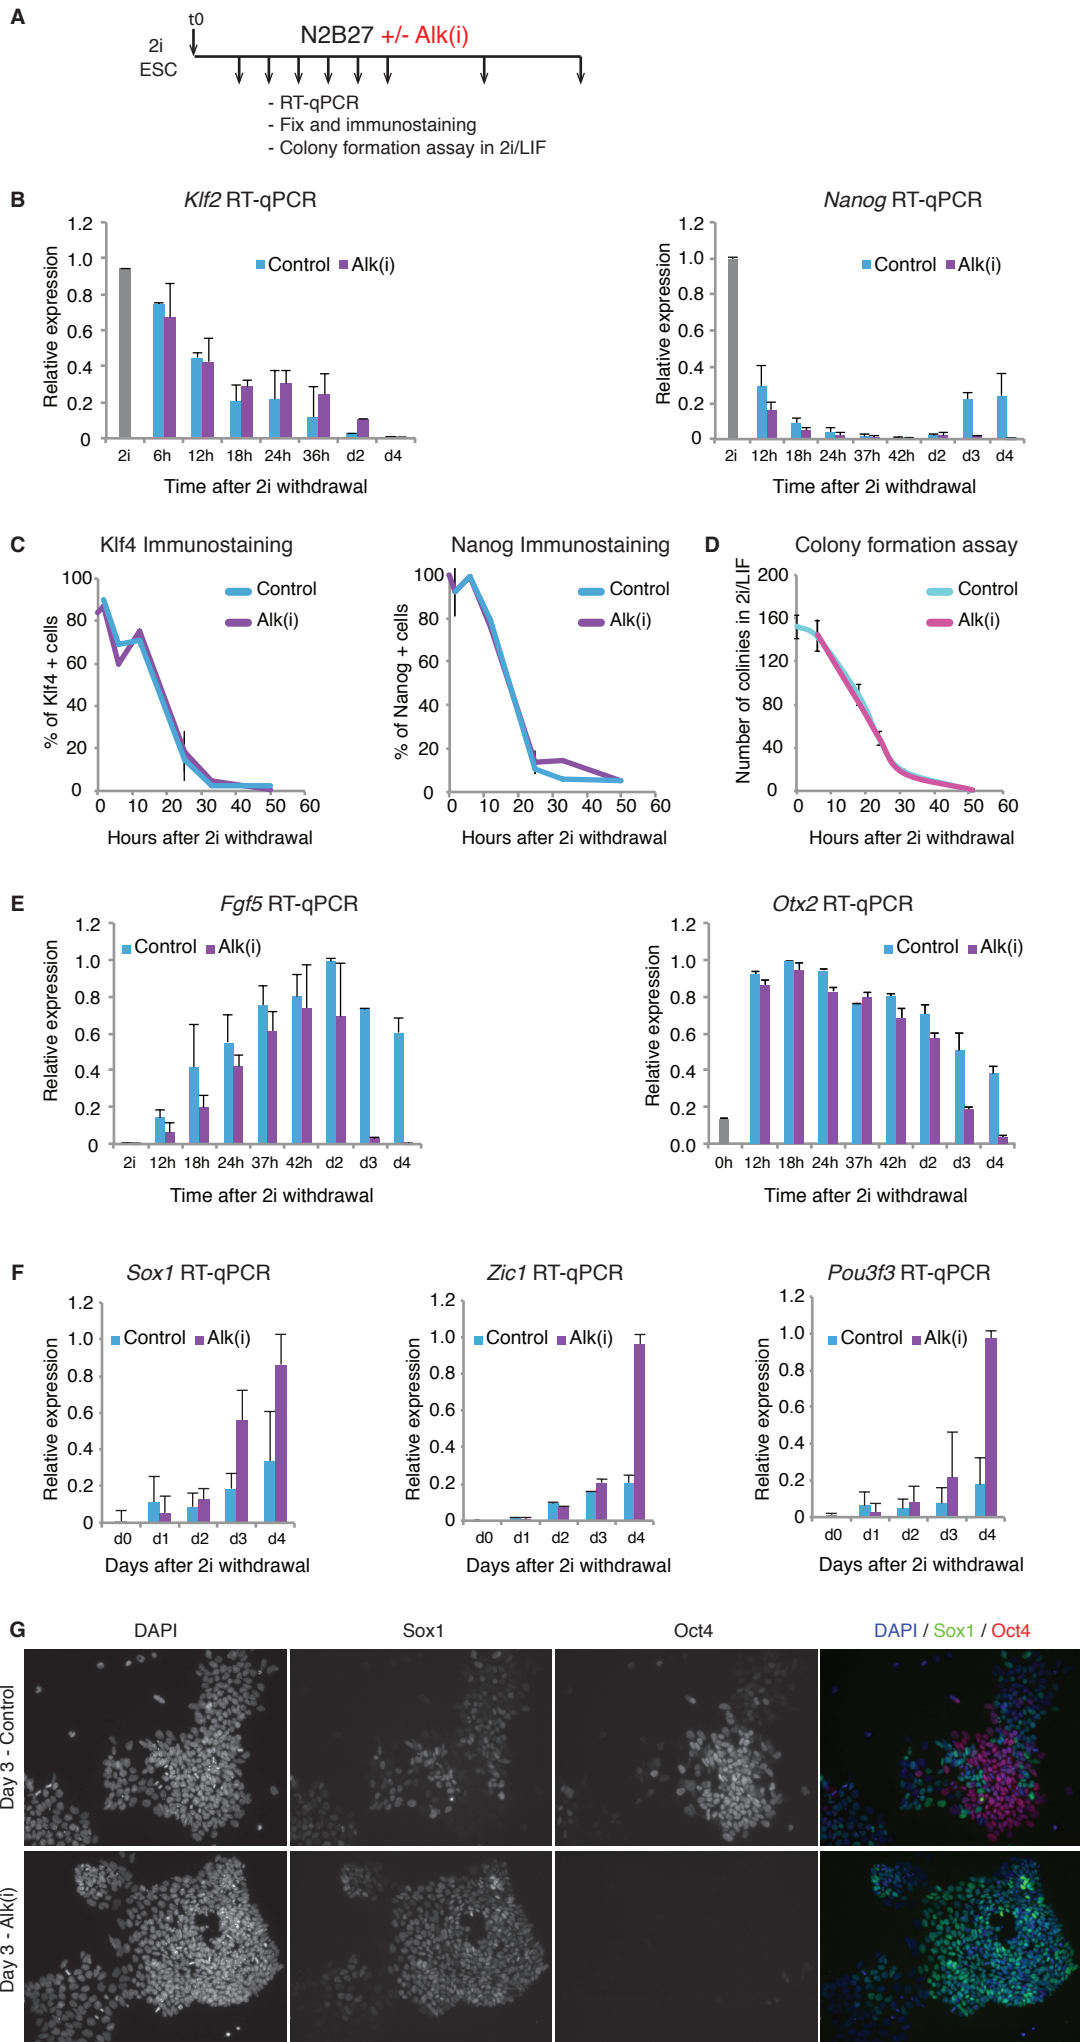

## Figure 4

### Nodal inhibition after Rex1 downregulation

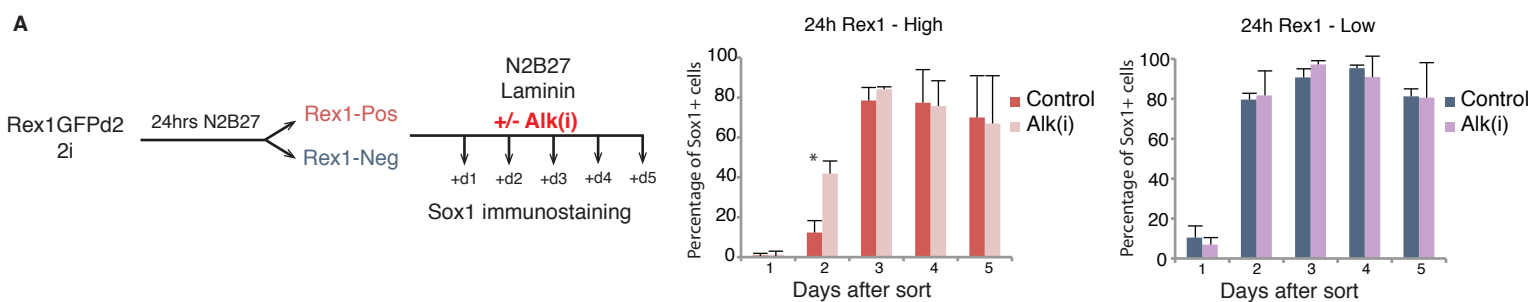

### Nodal inhibition before and during Rex1 downregulation

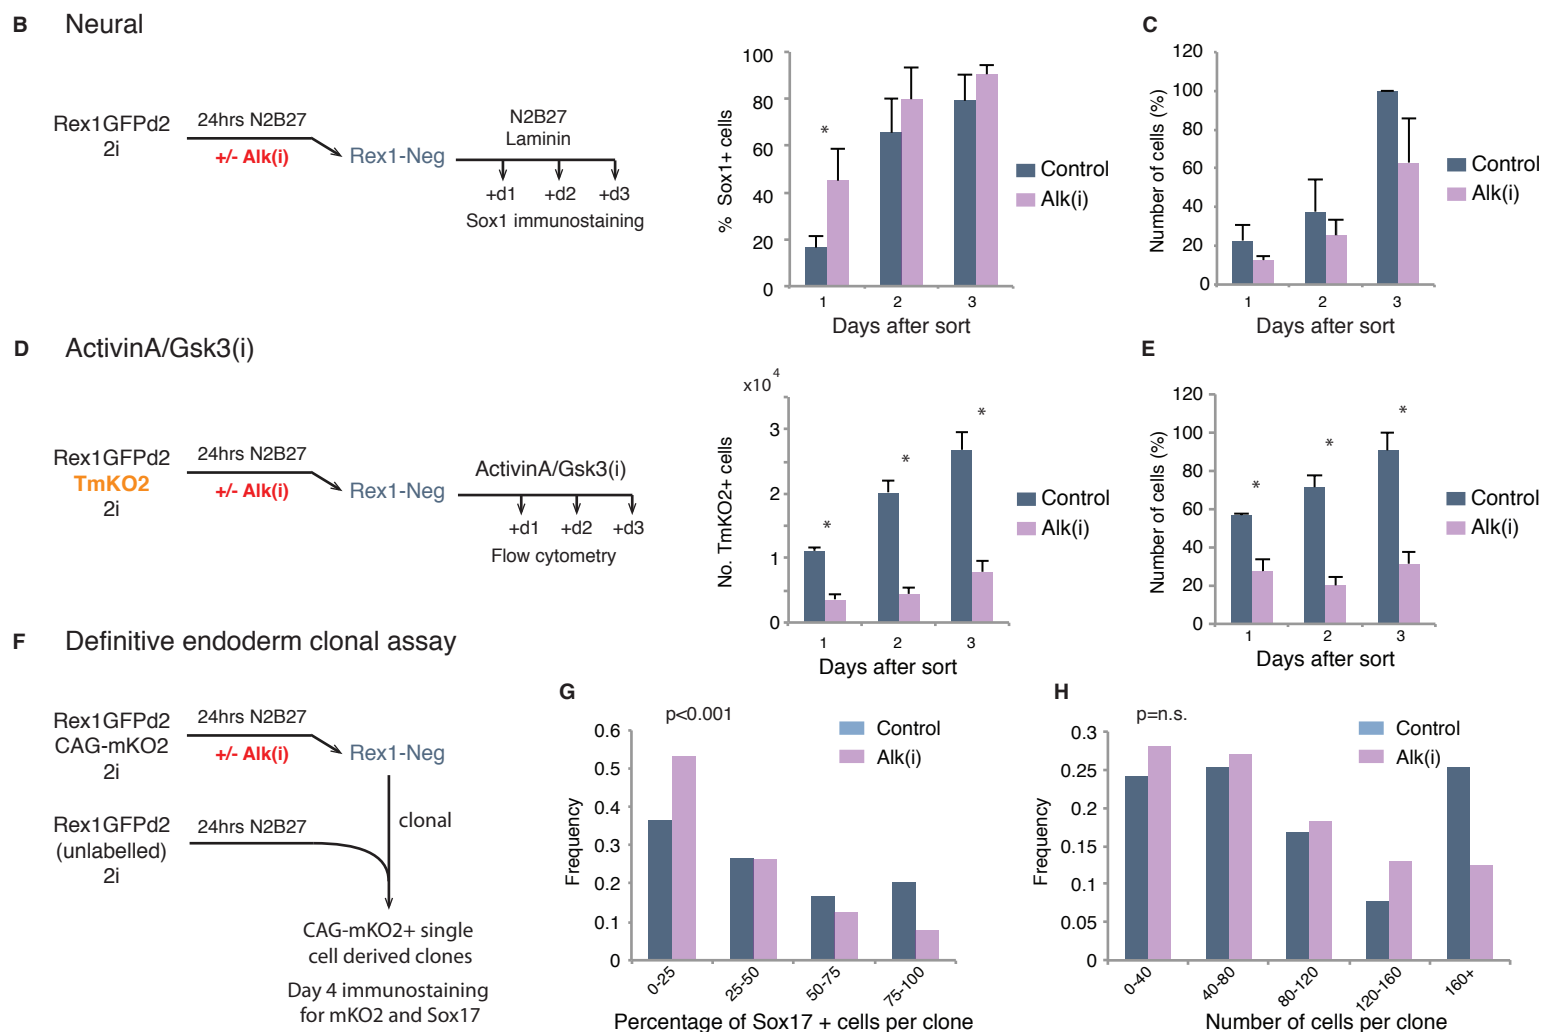

### I PGC-LC differentiation

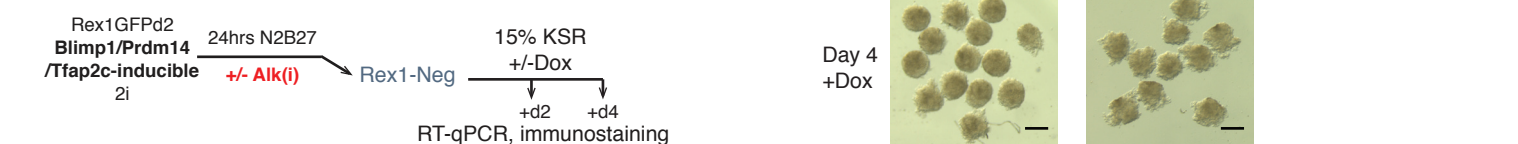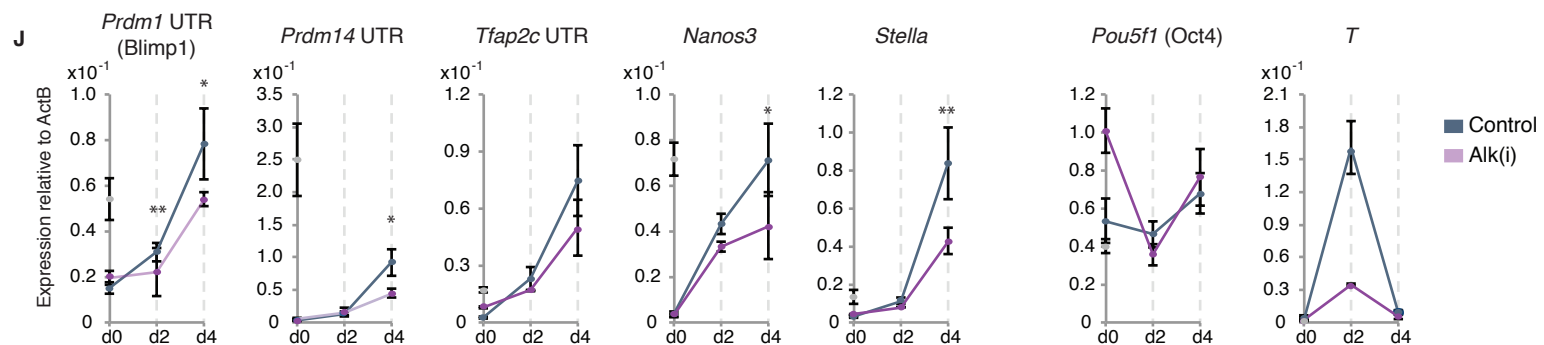

Source: https://www.biorxiv.org/content/10.1101/093880v1.full.pdf
